1 **Latitude-specific urbanization effects on life history traits in the damselfly *Ischnura***  
2 ***elegans***

3

4

5

6 Gemma Palomar<sup>1,2,†</sup>, Guillaume Vos<sup>1,\*,†</sup>, Robby Stoks<sup>3</sup>, Szymon Sniegula<sup>1,\*</sup>

7

8 <sup>1</sup> Institute of Nature Conservation Polish Academy of Sciences, al. Adama Mickiewicza 33,  
9 31-120 Krakow, Poland

10 <sup>2</sup> Department of Genetics, Physiology, and Microbiology, Complutense University of Madrid,  
11 C/Jose Antonio Novais 12, Madrid 28040, Spain

12 <sup>3</sup> Laboratory of Evolutionary Stress Ecology and Ecotoxicology, KU Leuven, Charles  
13 Deberiotstraat 32, 3000 Leuven, Belgium

14

15 † Both authors contributed equally to this work

16

17 \*Authors for correspondence

18 Guillaume Vos

19 vos@iop.krakow.pl

20 Szymon Sniegula

21 szymon.sniegula@gmail.com

22

23

24

25

26 **Abstract**

- 27 1. Many species are currently adapting to cities at different latitudes. Adaptation to  
28 urbanization may require eco-evolutionary changes in response to temperature and  
29 invasive species that may differ between latitudes.
- 30 2. Here, we studied single and combined effects of increased temperatures and invasive alien  
31 predator presence on the phenotypic response of replicated urban and rural populations of  
32 the damselfly *Ischnura elegans* and contrasted these between central and high latitudes.
- 33 3. Larvae were exposed to temperature treatments (current [20 °C], mild warming [24 °C],  
34 and heat wave [28 °C; for high latitude only]) crossed with the presence or absence of  
35 chemical cues released by the spiny-cheek crayfish (*Faxonius limosus*), only present at the  
36 central latitude. We measured treatment effects on larval development time, mass, and  
37 growth rate.
- 38 4. Urbanization type affected all life history traits, yet these responses were often dependent  
39 on latitude, temperature, and sex. Mild warming decreased mass in rural and increased  
40 growth rate in urban populations. The effects of urbanization on mass were latitude-  
41 dependent, with central-latitude populations having a greater phenotypic difference.  
42 Urbanization effects were sex-specific with urban males being lighter and having a lower  
43 growth rate than rural males. At the current temperature and mild warming, the predator  
44 cue reduced the growth rate, and this independently of urbanization level and latitude of  
45 origin. This pattern was reversed during a heat wave in high-latitude damselflies.
- 46 5. Our results highlight the context-dependency of evolutionary and plastic responses to  
47 urbanisation, and caution for generalizing how populations respond to cities based on  
48 populations at a single latitude.

49

50 Keywords: global warming, invasive alien species, *Ischnura elegans*, pace-of-life syndrome,  
51 phenotypic plasticity, temperature, urbanization

## 52 **Introduction**

53 Urbanization has emerged as a strong and widespread source of selection affecting plant and  
54 animal communities (Alberti, et al., 2017; Catullo et al., 2019). Urbanization is closely  
55 related to drivers of eco-evolutionary change such as temperature and invasive species.  
56 Within the cities, the dense concentration of pavement, buildings, and other surfaces that  
57 absorb and retain heat creates ‘urban heat islands’ in which temperature is higher (Tam et al.,  
58 2015). Urbanization may also favour the introduction of invasive species reducing diversity  
59 by competitive exclusion of native species (McKinney, 2006). These phenomena together  
60 with other factors related to urbanization, such as pollution or noise, create particular  
61 environments within the cities that drive evolutionary changes in organisms, e.g. at the  
62 phenotypic and physiological levels, and in their interactions with other organisms (Alberti,  
63 et al., 2017; Lambert et al., 2021).

64 Global warming and latitudinal gradient might further interact with urbanization and  
65 alter organisms thermal plasticity and evolution (Verheyen et al. 2019). These plastic and  
66 evolutionary responses may differ across the species latitudinal distribution because  
67 populations from different latitudes encounter different seasonal time constraints (Stoks et al.,  
68 2012). Since plastic responses are considered the first response to buffer the effects of novel  
69 environmental stressors (Fox et al., 2019), investigating reaction norms of organisms from  
70 urban and rural populations at different latitudes in response to warming and stress caused by  
71 invasive alien predators may provide valuable insights to forecast species’ phenotypic  
72 response to the rapid local and global changes (Verheyen et al., 2019). Life history traits such  
73 as body size are responsive to urbanization, although the trends are taxon dependent. While a  
74 reduction in body size was observed in urban bumblebees (Eggenberger et al., 2019) and  
75 birds (Meillère et al., 2015), the opposite pattern was found in moths (Merckx, et al., 2018).  
76 Urbanization effects may also be sex-specific, e.g. urban males are bigger in butterflies

77 (Kaiser et al., 2016). Available theories predict that when facing different ecological  
78 conditions, as generally observed along an urbanization or latitudinal gradient, organisms  
79 may be ranked from a slow- to fast-living continuum ('pace-of-life' syndrome; Brans & De  
80 Meester, 2018; Réale et al., 2010). This may be reflected by a shift towards a faster pace-of-  
81 life with accelerated growth, rapid development, and lower body mass as urbanization  
82 increases (Brans & De Meester, 2018; Debecker et al., 2016). Therefore, as urbanization is  
83 expected to affect life history strategies and patterns of covariation between traits, it is  
84 important to consider multiple life history traits, both sexes and other interacting drivers of  
85 evolutionary change such latitude-specific growth season length and warming, to better  
86 reflect anthropogenic impacts of cities on organisms.

87         In this study, we tested and contrasted the response of life history traits to single and  
88 combined thermal and invasive alien predator treatments between urban and rural populations  
89 from different latitudes. Special attention went to whether these life history responses were  
90 sex specific. We ran a common garden experiment on the damselfly *Ischnura elegans* from  
91 replicated rural and urban populations at high- (southern Sweden) and central- (southern  
92 Poland) latitudes. In damselflies, urban populations were shown to grow slower than rural  
93 populations at central latitudes (Tüzün & Stoks, 2021), but whether such pattern is consistent  
94 across the species latitudinal range requires further investigation. At the central latitude, the  
95 higher annual temperatures and associated longer growth season allow more generations per  
96 year, but less time per generation, thereby causing higher seasonal time constraints (Corbet et  
97 al., 2006; Stoks et al., 2012). As the effect of urbanization on life history may differ between  
98 mild warming and heat wave temperatures (e.g. 30 °C), we tested both in the same study.  
99 Besides a thermal treatment (mild warming and a heat wave), we imposed a treatment where  
100 we manipulated the presence of chemical predator cues from an invasive alien predator, the  
101 spiny-cheek crayfish, *Faxonius limosus*, which has been co-occurring with Polish *I. elegans*

102 populations for several decades, but has not been yet reported in Sweden. The spread of  
103 invasive crayfish predator has been largely mediated by human activities and urban areas  
104 represent an attractive environment for this species (Reynolds & Souty-Grosset, 2011).

105

## 106 **Materials and Methods**

### 107 *Study species*

108 *Ischnura elegans* is a common damselfly in Europe (Dijkstra & Schröter, 2020). Across a  
109 latitudinal gradient, populations are characterized by different number of generations per year  
110 (voltinism). At central latitudes (including Poland), populations are generally uni- and  
111 bivoltine, meaning one or two generations per year, respectively (Corbet et al., 2006; Norling,  
112 2021). At high latitudes (including Sweden), populations are usually uni- and semivoltine,  
113 meaning that one or two years are required for completing one generation, respectively.

114

### 115 *Study populations*

116 Adult *I. elegans* females were collected from two urban and two rural ponds each in southern  
117 Sweden (hereafter, high latitude) and in southern Poland (hereafter, central latitude) (Fig. 1,  
118 Table S1) on 22-23 June 2021, as described in Sniegula et al. (2020). The distances between  
119 urban and rural sites ranged from 5 to 19 km at the high latitude and from 26 to 96 km at the  
120 central latitude. We quantified the level of urbanization based on the percentage of  
121 impervious surface from the high-resolution layer database (20 m resolution) (EEA, 2020).  
122 We created a circular buffer of 1 km around each sampling location and calculated the  
123 average value of imperviousness in each buffer using Quantum-GIS (QGIS Development  
124 Team, 2017). Ponds were defined as urban when the average percentage of impervious  
125 surface area within the buffer was above 20 % and as rural when the percentage was below  
126 1.5 % (Brans & De Meester, 2018).

127 Water temperatures in the shallow parts of the collection ponds were estimated using  
128 the Lake Model FLake (2009) that closely matches the actual temperature measured in situ  
129 (Dinh Van et al., 2014). The modelled temperatures indicated minor differences in water  
130 temperature among ponds within- and between both latitudes (Fig. S1A and B). As the FLake  
131 model does not include impervious surface as a parameter and because water temperatures  
132 within a pond might vary depending on various parameters such as depth or sun exposure, we  
133 also placed temperature loggers (50 cm depth) in five ponds during summer and fall, and in  
134 one pond during an entire year (2021 and/or 2022; Fig. S1C and D). Based on FLake and  
135 dataloggers estimates, the average temperature in central- and high latitude ponds and  
136 between urban and rural ponds were similar and oscillated around 20 °C and were below 24  
137 °C during summer months (except one record in one Polish pond, Fig. 1C). Based on this and  
138 on previous records of freshwater summer water temperatures at these latitudes (Debecker &  
139 Stoks, 2019; Dinh Van et al., 2014), we set the following experimental temperatures: 20 °C  
140 corresponding to the current mean summer water temperature, 24 °C corresponding to the  
141 predicted increased temperature by 2100 under SSP8.5 scenario (Masson-Delmotte et al.,  
142 2021), and 28 °C matching a simulated heat wave.

143

#### 144 *The crayfish predator*

145 The spiny-cheek crayfish *Faxonius limosus* is an invasive alien predator and an active  
146 colonizer that has locally co-occurred with the central-latitude *I. elegans* for at least 50 years  
147 but has not been reported in Scandinavia (Artportalen, 2022; Commission Implementing  
148 Regulation, 2016; Kouba et al., 2014). The spiny-cheek crayfish is widely reported in Poland  
149 in rural and urban areas (The General Directorate for Environmental Protection, 2018). The  
150 spread of the spiny-cheek crayfish is driven by human activities (aquaculture, trading), and  
151 natural spread in Europe (Reynolds & Souty-Grosset, 2011) and occurs frequently in warm

152 temperatures (up to 25 °C) and in polluted waters (Chucholl, 2016). Potential future invasions  
153 are more likely to occur in urban areas. Prior the experiment, *F. limosus* were collected from  
154 Kryspinów Lake in southern Poland (50°3'0.461"N, 19°47'20.85"E) and transported to the  
155 Institute of Nature Conservation of the Polish Academy of Sciences, Kraków, Poland (INC  
156 PAS). Three crayfishes were kept in an aquarium holding 50 L of dechlorinated tap water  
157 along with a control aquarium with 50 L of dechlorinated tap water. Crayfish collection and  
158 housing were done with permission from the Regional Directorate for Environmental  
159 Protection in Kraków (ref. OP.672.4.2021.GZ).

160

#### 161 *Housing and temperature treatment*

162 Adult female damselflies were individually placed in plastic cups with perforated lids and  
163 wet filter paper for egg laying. Females were kept at ca. 22°C and natural daylight  
164 (photoperiod). In total 80 clutches (10 clutches per population, hereafter families) were used  
165 in the experiment. The design of the experiment involved the same pre-winter and winter  
166 rearing conditions (hereafter, first part of the experiment) for all larvae. During post-winter  
167 rearing conditions (hereafter, second part of the experiment), larvae were exposed to different  
168 thermal treatments and, on the day of entering into the last instar prior emergence (F-0),  
169 larvae were exposed to the predator cue treatments for the next 5 days. The experiment ended  
170 at the end of this 5-day predator cue exposure period.

171 The first part of the experiment was carried out in plastic containers (size 22×16 cm,  
172 height 11 cm) filled with 1500 mL of dechlorinated tap water. Containers were kept in an  
173 incubator at 22 °C and a photoperiod of L:D 20:4h. In these containers, larvae were reared in  
174 groups. The photoperiod indicated the longest day length at the high latitude collection site,  
175 and was expected to create high development and growth rates in both studied latitudes,  
176 especially during post-winter conditions (Norling, 2021). Each container was supplied with a



177 plastic structure to minimise predation among larvae. Since there were six different  
178 treatments after winter (i.e. during the second part of the experiment), larvae from each of the  
179 eight sampled populations were divided into six containers. At hatching, four larvae from  
180 each family were randomly placed in each of the six containers, totalling 40 larvae per  
181 container (4 larvae x 10 families). This approach ensured that each container started with  
182 exactly the same number of individuals from each family. Larvae were fed *ad libitum* with  
183 laboratory-cultured *Artemia nauplii*, twice a day on week days and once a day on weekend  
184 days. Furthermore, after three weeks of growing, we supplemented the feeding with live  
185 *Daphnia* sp. two times a week until autumn conditions. The position of the containers was  
186 randomized weekly within each incubator.

187       On 06 August 2021 (ca. four weeks after larvae had hatched), we started simulating  
188 autumn temperatures and photoperiods (hereafter, thermo-photoperiod) and, three weeks  
189 later, winter conditions. This procedure allowed larvae to experience a winter diapause, as it  
190 occurs in nature (Corbet 2006; Norling 2021). With a weekly interval, we gradually reduced  
191 the initial thermo-photoperiod from 22 °C and 20:4 h to 6 °C and 0:24 h L:D (simulated  
192 winter conditions). A detailed description of rearing thermo-photoperiods during the entire  
193 experiment are presented in Fig. S2. During the simulated winter, larvae were fed three times  
194 a week with *Artemia nauplii*. On 22 November 2022, we started the second part of the rearing  
195 experiment. We transferred the larvae to individual 200 mL cups (height = 9 cm, diameter =  
196 4 cm) filled with 100 mL of dechlorinated water and placed each cup into an incubator at 10  
197 °C and 4:20 h L:D. With a two-day interval, we gradually increased the thermo-photoperiod  
198 to the respective thermal treatment: 20 °C (control), 24 °C (mild warming) or 28 °C (heat  
199 wave, high latitude only) with the same 20:4 h L:D photoperiod for all temperature  
200 treatments (Fig. S2). For logistic reasons we could not set the 28 °C temperature treatment  
201 group for the central-latitude populations. We therefore split our design into two experiments:

202 Experiment 1 focusing on high- and central latitude populations raised at 20 °C and 24 °C,  
203 and Experiment 2 focusing on high-latitude populations raised at 20 °C, 24 °C and 28 °C.

204 Throughout the second part of the experiment, larvae were fed daily with *Artemia*  
205 *nauplii*. Because larvae came from different latitudes and because rearing temperature also  
206 affects larval development rate, larvae reached the F-0 stage at different dates. This led to  
207 larvae being exposed to the post-winter temperature treatment for different durations. For  
208 each larva, we reported the exact time in days at the temperature treatment during the second  
209 half of the experiment ('thermal exposure duration') and this time was included as a covariate  
210 in the statistical models (except for developmental time). In addition, when larvae entered F-  
211 0, we identified the sex of each individual to test for sex-specific responses to the treatments  
212 (Central latitude  $N_{\text{females}} = 73$ ,  $N_{\text{males}} = 68$ ; High latitude  $N_{\text{females}} = 158$ ,  $N_{\text{males}} = 182$ ).

213

#### 214 *Predator cue treatment*

215 When larvae entered the F-0 stage, we applied a five-day-long predator cue treatment. The  
216 water level in each cup was reduced to 67 mL and refilled with 33 mL of water from the  
217 crayfish aquarium (with predator cue) or the control aquarium (without predator cue). Cups  
218 were refilled every second day to keep the predator cue approximately constant, considering  
219 the length of predator cue biodegradation (Van Buskirk et al. 2014). Previous experiments  
220 have demonstrated that predator cues affect damselfly life history traits, also in case of short-  
221 time exposure (13 days exposure in Antoń & Sniegula, 2021; 3-9 days exposure in Van  
222 Dievel et al., 2016).

223

#### 224 *Response variables*

225 In total, 481 larvae survived and were phenotyped at the end of the experiment. Details on  
226 sample size for each treatment combination and response variable for both experiments are

227 presented in Table S2. When larvae entered F-0 and before the application of the predator cue  
228 treatment, we quantified three traits: development time (DT; number of days between  
229 hatching and moult into F-0), wet mass ( $\text{mass}_{F-0}$ ), and growth rate until F-0 ( $\text{GR}_{F-0}$ ). Larval  
230 wet mass was measured with an electronic balance (Radwag AS.62) and  $\text{GR}_{F-0}$  was  
231 calculated as  $\ln(\text{mass}_{F-0})/\text{age}_{F-0}$ . After the five-day exposure to a predator cue, we measured  
232 the wet mass again ( $\text{mass}_{\text{final}}$ ) and calculated the growth rate over the five-day period:  $\text{GR}_{\text{final}}$   
233 =  $[\ln(\text{mass}_{\text{final}}) - \ln(\text{mass}_{F-0})]/5$ , as in McPeck et al. (2001) (Table S3).

234

### 235 *Statistical analyses*

236 All analyses were performed in R (R Core Team, 2013; RStudio Team, 2015). For univariate  
237 statistics, we used generalized linear mixed-effects models (GLMMs). First, we ran a model  
238 selection analysis (MuMin r package; Barton & Barton, 2015) to select the most appropriate  
239 model for each phenotypic variable (DT,  $\text{mass}_{F-0}$ ,  $\text{GR}_{F-0}$ , and  $\text{GR}_{\text{final}}$ ). We included in the  
240 initial model the following predictors: latitude (only for experiment 1), sex, temperature,  
241 urbanization, predator (for  $\text{GR}_{\text{final}}$  only), and all the possible interactions; thermal exposure  
242 duration was added as a covariate (except for DT because this variable was strongly  
243 correlated with exposure duration) and population nested in latitude as a random factor. For  
244 each phenotypic variable, model selection analysis was based on the corrected Akaike's  
245 information criteria for sample size (AICc) and weights as criteria to determine the best  
246 explanatory linear model by keeping only the most relevant predictors and interactions (Table  
247 S4). In Experiment 1, we compared urbanization type (rural vs. urban population), latitude  
248 (high- and central-latitude), temperature (20 °C and 24 °C), sex (males and females) and  
249 predator (for  $\text{GR}_{\text{final}}$  only). We ran specific models for each variable:  $\text{DT}_{F-0}$  with a Poisson  
250 distribution, and  $\text{mass}_{F-0}$ ,  $\text{GR}_{F-0}$  and  $\text{GR}_{\text{Final}}$  with Gaussian distributions, based on the output  
251 of the model selection analysis. The variables were normally distributed. In Experiment 2, we

252 tested for effects of urbanisation type, temperature (20, 24 and 28°C) and predator (for GR  
253 <sub>final</sub> only) in high-latitude populations. To fit the GLMMs, we used the function `glmmTMB`  
254 (`glmmTMB` package; Magnusson et al., 2017). P-values were obtained using the Wald chi-  
255 square test (Wald  $X^2$ ) implemented in the `car` package (Fox & Weisberg, 2015).

256 To analyse in detail the multivariate phenotypic responses of the larvae we applied  
257 Phenotypic Trajectory Analysis (PTA) following the procedure and R scripts described in  
258 Adams & Collyer (2009) and Collyer & Adams (2007). For this analysis, we used the  
259 measurements when larvae entered F-0 (hence, prior to the predator cue treatment). We used  
260 PTA to compare trajectories of high- and central-latitude populations in response to  
261 urbanization (evolutionary change expressed as a magnitude of phenotypic difference  
262 between rural and urban populations) and to temperature (plastic change expressed as the  
263 slope of the thermal reaction norm). We ran PTA both with the sexes pooled and with males  
264 and females separately. The procedure consists on a vector analysis in a multivariate space of  
265 phenotypic trait change. First, we conducted a PCA using  $DT_{F-0}$ ,  $mass_{F-0}$ , and  $GR_{F-0}$ . To  
266 account for the fact that damselflies were exposed to the temperature treatment for different  
267 durations, we ran a GLM model for  $mass_{F-0}$  and  $GR_{F-0}$  with ‘thermal exposure duration’ as  
268 covariate and extracted the residuals that were subsequently used for the PCA and PTA  
269 analyses. Then, we created vectors connecting centroids of groups of individuals to calculate  
270 and compare the difference in length (magnitude) and angle (direction,  $\theta$ ) between groups.  
271 Significance in magnitude and direction were estimated using a permutation procedure ( $N =$   
272 1000 permutations); significant differences in the magnitude and direction between vectors  
273 were interpreted as different evolutionary or plastic trajectories.

274

## 275 **Results**

### 276 ***Experiment 1***

277 *Univariate response patterns*

278 The results testing for the effects of the treatments on DT, mass, and GR are shown in Table  
279 1. Urbanization had no main effect, but several interactions involving urbanization were  
280 significant. At 20 °C, urban larvae had a lower mass<sub>F-0</sub> and GR<sub>F-0</sub> compared to rural larvae.  
281 Mild warming (24 °C) reduced mass<sub>F-0</sub>, especially in rural larvae, and increased GR<sub>F-0</sub>,  
282 especially in urban larvae, eliminating the differences for these traits between urban and rural  
283 populations at 24 °C (interaction urbanization × temperature) (Fig. 2A and 2B). While urban  
284 and rural females did not differ in mass<sub>F-0</sub> and GR<sub>F-0</sub>, urban males were lighter and showed a  
285 lower GR<sub>F-0</sub> than rural males (interaction urbanization × sex) (Fig. 2C and 2D). Urbanization  
286 decreased larval mass, but in central-latitude individuals only (interaction latitude ×  
287 urbanization) (Fig. 1); there was a larger difference in mass<sub>F-0</sub> between latitudes in females  
288 than in males (interaction latitude × sex) (Fig. S3A). The interaction latitude × temperature  
289 was significant for GR<sub>F-0</sub>, with higher values of GR<sub>F-0</sub> in central- compared to high latitude  
290 individuals but only at 24 °C (Fig. S3B). DT was not affected by urbanization type, but  
291 independently affected by latitude and temperature, with a shorter development time in  
292 central-latitude larvae and in larvae reared at 24 °C (Table S5; Fig. S4).

293 During the five-day predator cue treatment, latitude and predator treatment had  
294 significant effect on GR<sub>final</sub>, with faster growth rate in central-latitude larvae and in the  
295 absence of predator cues (Table S5; Fig. S5). None of the interaction terms were significant  
296 for the GR<sub>final</sub>.

297

298 *Phenotypic Trajectory Analysis*

299 For central-latitude populations, evolutionary changes in response to urbanization between  
300 larvae raised at 20 °C and 24 °C did not differ in length ( $\text{Var}_{\text{length}} = 0.39$ ,  $p = 0.306$ ) nor in  
301 direction ( $\theta = 10.2^\circ$ ,  $p = 0.830$ ). Evolutionary changes driven by urbanization pointed mostly

302 to a lower mass and growth rate in urban areas (Fig. 3A). Plastic changes in response to mild  
303 warming temperature between rural and urban populations did not differ in length ( $\text{Var}_{\text{length}} =$   
304  $0.27$ ,  $p = 0.300$ ) nor in direction ( $\theta = 15.1^\circ$ ,  $p = 0.537$ ). Urban and rural populations  
305 responded in a similar way to mild warming temperature with a shorter development time  
306 when temperature increased (Fig. 3C).

307 Next, we ran similar analyses for males and females separately. For males, we found  
308 the same patterns for evolutionary and plastic changes as with the sexes pooled (Fig. S6A and  
309 C). For females, we found different evolutionary trajectories (differences in direction only)  
310 between females raised at  $20^\circ\text{C}$  and  $24^\circ\text{C}$  (Fig. S7A); at  $20^\circ\text{C}$  evolutionary changes in  
311 response to urbanization pointed to a decrease in mass and  $\text{GR}_{F-0}$  and the pattern was  
312 reversed at  $24^\circ\text{C}$ . Thermal plasticity did not differ between rural and urban females (Fig.  
313 S7C).

314 For high-latitude populations, when sexes were pooled, evolutionary changes in  
315 response to urbanization differed both in length ( $\text{Var}_{\text{length}} = 0.70$ ,  $p = 0.007$ ) and direction ( $\theta =$   
316  $132.4^\circ$ ,  $p = 0.001$ ) between the two temperature treatments (Fig. 3B). Urban larvae had a  
317 longer DT, and lower mass and GR than rural larvae at  $20^\circ\text{C}$ , whereas there was little  
318 difference between urban and rural damselflies at  $24^\circ\text{C}$ . Plastic changes in response to an  
319 increase in temperature showed no difference in magnitude between rural and urban  
320 populations ( $\text{Var}_{\text{length}} = 0.26$ ,  $p = 0.296$ ) but significant differences in direction ( $\theta = 39.9^\circ$ ,  $p =$   
321  $0.009$ ) with a decrease in mass and GR at  $24^\circ\text{C}$  only being present in rural populations (Fig.  
322 3D).

323 When looking at each sex separately, for males, we found the exact same patterns for  
324 evolutionary (Fig. S6B) and plastic (Fig. S6D) changes as with the sexes pooled. For females,  
325 evolutionary changes differed only in direction between the temperature treatments; at  $20^\circ\text{C}$   
326 evolutionary changes pointed to an increase in development time in urban area and at  $24^\circ\text{C}$

327 to an increase in mass and GR<sub>F-0</sub> (Fig S7B). Plastic changes to mild warming temperature for  
328 females followed the same pattern as with the sexes pooled (Fig. S7D).

329

## 330 ***Experiment 2.***

### 331 *Univariate response patterns*

332 In the set of high-latitude urban and rural larvae tested at the three temperatures, the score  
333 life-history traits (mass<sub>F0</sub>, DT<sub>F0</sub>, and GR<sub>F0</sub>) were not affected by urbanization, but were  
334 affected by temperature and sex (Table S4). The interaction temperature × sex was significant  
335 for both mass<sub>F-0</sub> and GR<sub>F-0</sub>, with higher values in mass<sub>F-0</sub> and GR<sub>F-0</sub> in females, especially  
336 at 24 °C (Fig. S8). GR<sub>final</sub> was not affected by urbanization. Exposure to the predator cue  
337 during the five-day-long treatment reduced GR<sub>final</sub> at 20°C and 24°C, but instead increased  
338 GR<sub>final</sub> at 28°C (predator × temperature) (Fig. 1).

339

### 340 *Phenotypic Trajectory Analysis*

341 Phenotypic trajectory analysis showed that high-latitude populations exhibited different  
342 evolutionary changes in response to urbanization across the three temperature treatments  
343 (sexes pooled). We did not find significant variation in magnitude between the three vectors  
344 ( $\text{Var}_{\text{length}} = 0.02$ ,  $p = 0.218$ ) but we found significant differences in their direction ( $\text{Var}_{\text{direction}}$   
345  $= 3547.0$ ,  $p = 0.001$ ) (Fig. 4A). At 20 °C and 28°C, urbanization is mostly accompanied by  
346 longer development and lower mass<sub>F-0</sub> and GR<sub>F-0</sub>, whereas at 24 °C differences between  
347 rural and urban individuals were rather small. For plastic changes, PTA revealed significant  
348 differences in length ( $\text{Var}_{\text{length}} = 0.720$ ,  $p = 0.016$ ) but not in direction ( $\text{Var}_{\text{direction}} = 10.0$ ,  $p =$   
349  $0.222$ ) between the two vectors indicating a greater thermal plasticity in urban than in rural  
350 populations (Fig. 4B).

351           When looking at each sex separately, evolutionary changes in response to  
352 urbanization were similar for males and females and followed the same patterns as with the  
353 sexes pooled (Fig. S9A and B). For plastic changes, no difference in both length and direction  
354 was found in males (Fig. S9C), whereas differences in length were found in females (Fig.  
355 S9D); with a greater thermal plastic response in females from urban than rural populations.

356

## 357 **Discussion**

358 Here, we studied phenotypic adaptation in an ectotherm considering several life-history traits  
359 and interacting drivers of evolutionary change. Our results pointed to effects of urbanization  
360 in combination with temperature on mass and GR. Notably, the direction and magnitude of  
361 the evolutionary and plastic responses to temperature in life history traits (i.e. body mass and  
362 GR) were not uniform across studied latitudes. The response to a predator was rather  
363 independent of the latitudinal origin of the populations and of the urbanization type. Our  
364 results shed some light on the effect of interacting anthropogenic factors in ectotherms life-  
365 history traits and how these patterns are latitude dependent.

366

### 367 *Effects on individual traits*

368 In Experiment 1, we found negative effects of urbanization on larval growth rate and mass,  
369 but these effects differed between latitudes and depended on temperature. This partially  
370 confirmed that urbanization can decrease mass in insects (Merckx, et al., 2018), and that mass  
371 decrease is temperature-dependent (Diamond et al., 2014). A mild warming temperature was  
372 sufficient to remove the differences between rural and urban larval mass and growth rate.  
373 Intriguingly, these two traits showed higher thermal plasticity at different urbanization types.  
374 While mass showed steeper thermal reaction norm in rural populations, urban populations  
375 were more plastic for GR. We might hypothesise that the effect of temperature was stronger



376 than the effect of urbanization and that growth rate reached some physiological limits at 24  
377 °C (growth rate did not increase at 28 °C in high latitude populations), however, the pattern  
378 was less clear for the mass.

379 Notably, the effects of urbanization were also latitude-dependent. The latitudinal  
380 difference may be attributed to different life-history strategies related to voltinism and  
381 seasonal time constraints. At central latitudes, the species produces, on average, one  
382 generation per year more than at high latitudes (Corbet et al., 2006; Norling, 2021).  
383 Therefore, central-latitude larvae are likely more time constrained: they develop within a  
384 shorter time, grow faster and reach lower mass than at high latitudes (as seen for the species  
385 between low and high latitudes, e.g. Debecker and Stoks 2019). A higher growth rate indeed  
386 often comes at a cost of having a smaller mass at emergence (Sniegula et al., 2018). In  
387 current study, latitudinal differences in mass seemed to be amplified by urbanization. Indeed,  
388 with climate change, there might be a further increase in time constraints in urban areas for  
389 central-latitude individuals that might arise from the heat-island effects (Chick et al., 2019).  
390 However, based on our field measurements, contemporary water temperatures in urban and  
391 rural ponds differed slightly (Fig. S1), and it is difficult to predict whether climate change  
392 will increase this difference in temperature.

393 Independently of urbanization and latitude, the predator cue negatively affected larval  
394 GR. In insects, exposure to a predator alters metabolism (Cinel et al., 2020) and foraging  
395 activity (Kohler & McPeck, 1989), with downstream effects on larval development and  
396 growth rate. Our results indicate that both central- and high-latitude populations reacted in a  
397 similar way to the predator cue in the traits we measured. These results contrast with a recent  
398 study showing a differential response in development time in *I. elegans* eggs when exposed  
399 to cues from non-native invasive predators (spiny-cheek and signal crayfish *Pacifastacus*  
400 *leniusculus*) (Antoń & Sniegula, 2021). However, an exposure to a phylogenetically related

401 predator species, i.e. noble crayfish (*Astacus astacus*) present at both latitudes (Kouba et al.,  
402 2014), might enable predator cue recognition and trigger similar responses between the two  
403 latitudes (Anton et al., 2020).

404 Results from Experiment 2 did not provide evidence that urban and rural populations  
405 coped differently with a simulated heat wave, as previously demonstrated in damselflies  
406 (Tüzün & Stoks, 2021) and other ectotherms (Brans et al., 2017; Campbell-Staton et al.,  
407 2020). This may stem from the minor mean temperature differences between urban and rural  
408 ponds at our study sites or different experimental approaches. Yet, we found a significant  
409 effect of temperature in combination with predator cues. Damselflies grew faster in the  
410 absence of a predator cue, but only in current and warming temperature. Interestingly,  
411 exposure to the predator cues increased larval growth under a heat wave treatment. A  
412 combination of stressors may change a strategy in potential prey to escape predator exposure  
413 (Warkentin, 2011). Here, an accelerated larval growth in the presence of a predator cue under  
414 heat wave may be part of an escape strategy to reduce the time of exposure to predators, as  
415 previously shown in odonate species (Antoń & Sniegula, 2021; Stoks et al., 2012) and other  
416 taxa (Chivers et al., 2001).

417 In both experiments, we found multiple sex-specific effects on mass and GR with  
418 greater phenotypic differences between urbanization types and temperatures in males. These  
419 results supported previous studies in which sex-specific effects were found in ectotherms  
420 coping with various stressors, i.e. urbanization (Kaiser et al., 2016) and heat stress (Sniegula  
421 et al., 2017). Sex-specific effects are generally more pronounced in species with strong sexual  
422 dimorphism which is the case in damselflies, with females being usually larger and heavier  
423 than males (Corbet, 1999). Sex-specific effects are also common in protandrous species with  
424 a strong selection acting on males to emerge before females in order to maximise their mating  
425 opportunities (Badyaev, 2002). Hence, different selective pressures resulting in different life-

426 history strategies and associated resource allocation patterns between males and females may  
427 lead to different types of trade-offs. For instance, female butterflies maintained a relative high  
428 body mass under different thermal conditions compared to males because mass was more  
429 important for females in reproduction than for males (Fischer & Fiedler, 2000). This is likely  
430 to be the case in odonates (Sokolovska et al., 2000) and matched our observations of mass of  
431 females being less affected by urbanization and temperature than males (at least until 24 °C;  
432 Fig. S3A).

433

#### 434 *Multivariate approach*

435 Our results indicate multivariate evolutionary change associated to urbanization at the high  
436 latitude since larvae from urban and rural sites differed in life history traits and in their  
437 thermal plasticity. In contrast, central-latitude damselflies exhibited similar direction and  
438 magnitude of evolutionary trajectories in response to urbanization in the two temperature  
439 treatments (Experiment 1). Similar results were found in high-latitude individuals in response  
440 to urbanization and additional simulation of heat wave (Experiment 2). The ‘pace-of-life’  
441 syndrome predicts a shift towards a fast-living strategy when urbanization increases or  
442 towards lower latitudes, which was supported empirically in birds and invertebrates (Brans &  
443 De Meester, 2018; Charmantier et al., 2017; Debecker et al., 2016). We observed that only  
444 high latitude damselflies expressed a consistent decrease in mass and growth rate associated  
445 with urbanization at 20 °C, which was further accompanied with an increase of development  
446 time. Hence, we found no support for a faster pace-of-life in the studied populations. One  
447 explanation might be the minor difference in water temperatures recorded in ponds from  
448 which rural and urban *I. elegans* were collected. However, in the damselfly *Coenagrion*  
449 *puella* a lower growth rate in urban compared to rural populations was also shown, despite  
450 water temperatures being up to 3.5 °C higher in urban than in rural ponds (Tüzün & Stoks,

451 2021). In that study, the population-specific growth pattern was explained by relatively lower  
452 temperature and hence shorter growing seasons in rural populations, i.e. compensation to  
453 time constraints by increased growth rate. Our results might, therefore, reflect selection  
454 caused by other sources of disturbance associated with the urban environment, e.g. different  
455 concentrations of pollutants. Notably, we demonstrated sex-specific evolutionary trajectories  
456 to urbanization at both latitudes. Therefore, the population origin (latitude) and the sex, which  
457 entail different life-history strategies or trade-offs, were more likely to trigger different  
458 trajectories than a shared response to urbanization.

459 Increased levels of environmental disturbance, including stress linked to suboptimal  
460 temperatures, in cities is expected to favour phenotypic plasticity (Alberti, et al., 2017). In  
461 contrast, rural and urban populations from the central latitude responded with similar  
462 magnitude and direction to mild warming by decreasing developmental time, whereas high-  
463 latitude populations showed similar plasticity in this trait to mild warming in terms of  
464 magnitude, but not in terms of direction. However, in response to the heat wave, we did find  
465 a greater magnitude of the plastic response in urban populations for  $GR_{F-0}$  and mass,  
466 matching the expectation of an increased phenotypic plasticity in urban populations. Different  
467 effects of urbanization on plasticity between the two latitudes may be partially caused by  
468 different life history strategies: lower latitude organisms tend to have shorter generation times  
469 (Corbet et al., 2006). Based on these results, we may infer that not only ‘urban heat island’  
470 effects impose differential selective pressures on organisms across urbanisation gradients  
471 (Shochat et al., 2006), but also geographic origin and temperature exposition in rural and  
472 urban populations have the potential to adjust the damselfly phenotype.

473

474 **Conclusion**

475 Despite the accumulating evidence that urbanization shapes phenotypes, and the expectation  
476 these evolutionary and plastic responses may differ among latitudes, the latter has rarely been  
477 tested. We showed that the damselfly responses to urbanization differed between latitudes.  
478 Notably, the latitude-specific responses to urbanisation were temperature-dependent, which  
479 could be explained by differences in life-history strategies across latitudes. Both urban and  
480 rural populations had the potential to produce a plastic response to warming, yet the  
481 magnitude and direction of the plastic changes differed between latitudes. Moreover, we  
482 added to the knowledge that the response to urbanization can differ between sexes. In  
483 contrast, urban and rural damselflies responded similarly to the presence of a predator cue,  
484 the later interacting with different temperatures. Our results highlight the context-dependency  
485 of evolutionary and plastic responses to urbanisation, and caution for generalizing of how  
486 populations respond to cities based on populations at a single latitude.

487

488

489 **Reference**

- 490 Adams, D. C., & Collyer, M. L. (2009). A general framework for the analysis of phenotypic  
491 trajectories in evolutionary studies. *Evolution: International Journal of Organic*  
492 *Evolution*, 63(5), 1143–1154.
- 493 Alberti, M., Correa, C., Marzluff, J. M., Hendry, A. P., Palkovacs, E. P., Gotanda, K. M.,  
494 Hunt, V. M., Apgar, T. M., & Zhou, Y. (2017). Global urban signatures of phenotypic  
495 change in animal and plant populations. *Proceedings of the National Academy of*  
496 *Sciences*, 114(34), 8951–8956. <https://doi.org/10.1073/pnas.1606034114>
- 497 Alberti, M., Marzluff, J., & Hunt, V. M. (2017). Urban driven phenotypic changes: Empirical  
498 observations and theoretical implications for eco-evolutionary feedback.  
499 *Philosophical Transactions of the Royal Society B: Biological Sciences*, 372(1712),  
500 20160029.
- 501 Antoń, A., & Sniegula, S. (2021). Damselfly eggs alter their development rate in the presence  
502 of an invasive alien cue but not a native predator cue. *Ecology and Evolution*, 11(14),  
503 9361–9369. <https://doi.org/10.1002/ece3.7729>
- 504 Anton, A., Geraldi, N. R., Ricciardi, A., & Dick, J. T. A. (2020). Global determinants of prey  
505 naiveté to exotic predators. *Proceedings of the Royal Society B: Biological Sciences*,  
506 287(1928), 20192978. <https://doi.org/10.1098/rspb.2019.2978>
- 507 Artportalen (Swedish Species Observation System) (2022). ArtDatabanken.  
508 dataset/occurrence. <http://www.gbif.se/ipt/resource?r=artdata>
- 509 Badyaev, A. V. (2002). Growing apart: An ontogenetic perspective on the evolution of sexual  
510 size dimorphism. *Trends in Ecology & Evolution*, 17(8), 369–378.  
511 [https://doi.org/10.1016/S0169-5347\(02\)02569-7](https://doi.org/10.1016/S0169-5347(02)02569-7)
- 512 Barton, K., & Barton, M. K. (2015). Package ‘mumin.’ *Version*, 1(18), 439.
- 513 Brans, K. I., & De Meester, L. (2018). City life on fast lanes: Urbanization induces an  
514 evolutionary shift towards a faster lifestyle in the water flea *Daphnia*. *Functional*  
515 *Ecology*, 32(9), 2225–2240. <https://doi.org/10.1111/1365-2435.13184>
- 516 Brans, K. I., Jansen, M., Vanoverbeke, J., Tüzün, N., Stoks, R., & De Meester, L. (2017). The  
517 heat is on: Genetic adaptation to urbanization mediated by thermal tolerance and body  
518 size. *Global Change Biology*, 23(12), 5218–5227. <https://doi.org/10.1111/gcb.13784>
- 519 Buskirk, J. V., Krügel, A., Kunz, J., Miss, F., & Stamm, A. (2014). The Rate of Degradation  
520 of Chemical Cues Indicating Predation Risk: An Experiment and Review. *Ethology*,  
521 120(9), 942–949. <https://doi.org/10.1111/eth.12266>
- 522 Campbell-Staton, S. C., Winchell, K. M., Rochette, N. C., Fredette, J., Maayan, I., Schweizer,  
523 R. M., & Catchen, J. (2020). Parallel selection on thermal physiology facilitates  
524 repeated adaptation of city lizards to urban heat islands. *Nature Ecology & Evolution*,  
525 4(4), Article 4. <https://doi.org/10.1038/s41559-020-1131-8>
- 526 Catullo, R. A., Llewelyn, J., Phillips, B. L., & Moritz, C. C. (2019). The potential for rapid  
527 evolution under anthropogenic climate change. *Current Biology*, 29(19), R996–  
528 R1007. <https://doi.org/10.1016/j.cub.2019.08.028>
- 529 Charmantier, A., Demeyrier, V., Lambrechts, M., Perret, S., & Grégoire, A. (2017).  
530 Urbanization is associated with divergence in pace-of-life in great tits. *Frontiers in*  
531 *Ecology and Evolution*, 5.  
532 <https://www.frontiersin.org/articles/10.3389/fevo.2017.00053>
- 533 Chick, L. D., Strickler, S. A., Perez, A., Martin, R. A., & Diamond, S. E. (2019). Urban heat  
534 islands advance the timing of reproduction in a social insect. *Journal of Thermal*  
535 *Biology*, 80, 119–125. <https://doi.org/10.1016/j.jtherbio.2019.01.004>
- 536 Chivers, D. P., Kiesecker, J. M., Marco, A., Devito, J., Anderson, M. T., & Blaustein, A. R.  
537 (2001). Predator-induced life history changes in amphibians: Egg predation induces  
538 hatching. *Oikos*, 92(1), 135–142. <https://doi.org/10.1034/j.1600-0706.2001.920116.x>

- 539 Chucholl, C. (2016). The bad and the super-bad: Prioritising the threat of six invasive alien to  
540 three imperilled native crayfishes. *Biological Invasions*, 18(7), 1967–1988.  
541 <https://doi.org/10.1007/s10530-016-1141-2>
- 542 Cinel, S. D., Hahn, D. A., & Kawahara, A. Y. (2020). Predator-induced stress responses in  
543 insects: A review. *Journal of Insect Physiology*, 122, 104039.  
544 <https://doi.org/10.1016/j.jinsphys.2020.104039>
- 545 Collyer, M. L., & Adams, D. C. (2007). Analysis of two-state multivariate phenotypic change  
546 in ecological studies. *Ecology*, 88(3), 683–692. <https://doi.org/10.1890/06-0727>
- 547 Commission Implementing Regulation. (2016). Regulation. 2016/1141 of 13 July 2016  
548 adopting a list of invasive alien species of Union concern pursuant to Regulation (EU)  
549 No 1143/2014 of the European Parliament and of the Council
- 550 Corbet, P. S. (1999). *Dragonflies: Behaviour and ecology of Odonata*. Harley books.
- 551 Corbet, P. S., Suhling, F., & Soendergerath, D. (2006). Voltinism of Odonata: A review.  
552 *International Journal of Odonatology*, 9(1), 1–44.
- 553 Debecker, S., Sanmartín-Villar, I., de Guinea-Luengo, M., Cordero-Rivera, A., & Stoks, R.  
554 (2016). Integrating the pace-of-life syndrome across species, sexes and individuals:  
555 Covariation of life history and personality under pesticide exposure. *Journal of*  
556 *Animal Ecology*, 85(3), 726–738. <https://doi.org/10.1111/1365-2656.12499>
- 557 Debecker, S., & Stoks, R. (2019). Pace of life syndrome under warming and pollution:  
558 Integrating life history, behavior, and physiology across latitudes. *Ecological*  
559 *Monographs*, 89(1), e01332.
- 560 Diamond, S. E., Cayton, H., Wepprich, T., Jenkins, C. N., Dunn, R. R., Haddad, N. M., &  
561 Ries, L. (2014). Unexpected phenological responses of butterflies to the interaction of  
562 urbanization and geographic temperature. *Ecology*, 95(9), 2613–2621.
- 563 Dijkstra, K.-D., & Schröter, A. (2020). *Field guide to the dragonflies of Britain and Europe*.  
564 Bloomsbury Publishing.
- 565 Dinh Van, K., Janssens, L., Debecker, S., & Stoks, R. (2014). Temperature and  
566 latitude specific individual growth rates shape the vulnerability of damselfly larvae  
567 to a widespread pesticide. *Journal of Applied Ecology*, 51(4), 919–928.
- 568 EEA. (2020). © European Union, Copernicus Land Monitoring Service [Accessed  
569 17.02.2023] <https://land.copernicus.eu/pan-european>.
- 570 Eggenberger, H., Frey, D., Pellissier, L., Ghazoul, J., Fontana, S., & Moretti, M. (2019).  
571 Urban bumblebees are smaller and more phenotypically diverse than their rural  
572 counterparts. *Journal of Animal Ecology*, 88(10), 1522–1533.  
573 <https://doi.org/10.1111/1365-2656.13051>
- 574 Fischer, K., & Fiedler, K. (2000). Sex-related differences in reaction norms in the butterfly  
575 *Lycaena tityrus* (Lepidoptera: Lycaenidae). *Oikos*, 90(2), 372–380.  
576 <https://doi.org/10.1034/j.1600-0706.2000.900218.x>
- 577 Fox, J., & Weisberg, S. (2015). *Using car functions in other functions*.
- 578 Fox, R. J., Donelson, J. M., Schunter, C., Ravasi, T., & Gaitán-Espitia, J. D. (2019). Beyond  
579 buying time: The role of plasticity in phenotypic adaptation to rapid environmental  
580 change. *Philosophical Transactions of the Royal Society B: Biological Sciences*,  
581 374(1768), 20180174. <https://doi.org/10.1098/rstb.2018.0174>
- 582 Kaiser, A., Merckx, T., & Van Dyck, H. (2016). The Urban Heat Island and its spatial scale  
583 dependent impact on survival and development in butterflies of different thermal  
584 sensitivity. *Ecology and Evolution*, 6(12), 4129–4140.  
585 <https://doi.org/10.1002/ece3.2166>
- 586 Kohler, S. L., & McPeck, M. A. (1989). Predation risk and the foraging behavior of  
587 competing stream insects. *Ecology*, 70(6), 1811–1825.

- 588 Kouba, A., Petrusek, A., & Kozak, P. (2014). Continental-wide distribution of crayfish  
589 species in Europe: Update and maps. *Knowledge and Management of Aquatic*  
590 *Ecosystems*, 413, 05. <https://doi.org/10.1051/kmae/2014007>
- 591 Lake Model Flake. (2009). *FLake*. [http://www.Cosmo-](http://www.Cosmo-Model.Org/Content/Model/Modules/Flake/)  
592 [Model.Org/Content/Model/Modules/Flake/](http://www.Cosmo-Model.Org/Content/Model/Modules/Flake/) [Accessed: 2-05-2017].
- 593 Lambert, M. R., Brans, K. I., Des Roches, S., Donihue, C. M., & Diamond, S. E. (2021).  
594 Adaptive evolution in cities: Progress and misconceptions. *Trends in Ecology &*  
595 *Evolution*, 36(3), 239–257. <https://doi.org/10.1016/j.tree.2020.11.002>
- 596 Magnusson, A., Skaug, H., Nielsen, A., Berg, C., Kristensen, K., Maechler, M., van  
597 Bentham, K., Bolker, B., Brooks, M., & Brooks, M. M. (2017). Package  
598 ‘glmmTMB.’ *R Package Version 0.2. 0*.
- 599 Masson-Delmotte, V., Zhai, P., Pirani, A., Connors, S. L., Péan, C., Berger, S., Caud, N.,  
600 Chen, Y., Goldfarb, L., & Gomis, M. I. (2021). Climate change 2021: The physical  
601 science basis. *Contribution of Working Group I to the Sixth Assessment Report of the*  
602 *Intergovernmental Panel on Climate Change*, 2.
- 603 McKinney, M. L. (2006). Urbanization as a major cause of biotic homogenization. *Biological*  
604 *Conservation*, 127(3), 247–260. <https://doi.org/10.1016/j.biocon.2005.09.005>
- 605 McPeck, M. A., Grace, M., & Richardson, J. M. (2001). Physiological and behavioral  
606 responses to predators shape the growth/predation risk trade-off in damselflies.  
607 *Ecology*, 82(6), 1535–1545.
- 608 Meillère, A., Brischoux, F., Parenteau, C., & Angelier, F. (2015). Influence of urbanization  
609 on body size, condition, and physiology in an urban exploiter: A multi-component  
610 approach. *PloS One*, 10(8), e0135685.
- 611 Merckx, T., Kaiser, A., & Van Dyck, H. (2018). Increased body size along urbanization  
612 gradients at both community and intraspecific level in macro-moths. *Global Change*  
613 *Biology*, 24(8), 3837–3848. <https://doi.org/10.1111/gcb.14151>
- 614 Merckx, T., Souffreau, C., Kaiser, A., Baardsen, L. F., Backeljau, T., Bonte, D., Brans, K. I.,  
615 Cours, M., Dahirel, M., Debortoli, N., De Wolf, K., Engelen, J. M. T., Fontaneto, D.,  
616 Gianuca, A. T., Govaert, L., Hendrickx, F., Higuti, J., Lens, L., Martens, K., ... Van  
617 Dyck, H. (2018). Body-size shifts in aquatic and terrestrial urban communities.  
618 *Nature*, 558(7708), Article 7708. <https://doi.org/10.1038/s41586-018-0140-0>
- 619 Norling, U. (2021). Growth, winter preparations and timing of emergence in temperate zone  
620 Odonata: Control by a succession of larval response patterns. *International Journal of*  
621 *Odonatology*, 24, 1–36.
- 622 QGIS Development Team. (2017). QGIS Geographic Information System. Open Source  
623 Geospatial Foundation Project. <http://qgis.org>.
- 624 R Core Team. (2013). *R: A language and environment for statistical computing*. R  
625 Foundation for Statistical Computing, Vienna, Austria.  
626 [https://www.gbif.org/tool/81287/r-a-language-and-environment-for-statistical-](https://www.gbif.org/tool/81287/r-a-language-and-environment-for-statistical-computing)  
627 [computing](https://www.gbif.org/tool/81287/r-a-language-and-environment-for-statistical-computing)
- 628 Réale, D., Garant, D., Humphries, M. M., Bergeron, P., Careau, V., & Montiglio, P.-O.  
629 (2010). Personality and the emergence of the pace-of-life syndrome concept at the  
630 population level. *Philosophical Transactions of the Royal Society B: Biological*  
631 *Sciences*, 365(1560), 4051–4063. <https://doi.org/10.1098/rstb.2010.0208>
- 632 Reynolds, J., & Souty-Grosset, C. (2011). *Management of freshwater biodiversity: Crayfish*  
633 *as bioindicators*. Cambridge University Press.
- 634 RStudio Team. (2015). *RStudio: Integrated Development for R*. RStudio, Inc., Boston, MA  
635 [URL http://www.rstudio.com/](http://www.rstudio.com/).



- 636 Shochat, E., Warren, P. S., Faeth, S. H., McIntyre, N. E., & Hope, D. (2006). From patterns  
637 to emerging processes in mechanistic urban ecology. *Trends in Ecology & Evolution*,  
638 *21*(4), 186–191. <https://doi.org/10.1016/j.tree.2005.11.019>
- 639 Sniegula, S., Golab, M. J., Drobniak, S. M., & Johansson, F. (2018). The genetic variance but  
640 not the genetic covariance of life-history traits changes towards the north in a time-  
641 constrained insect. *Journal of Evolutionary Biology*, *31*(6), 853–865.  
642 <https://doi.org/10.1111/jeb.13269>
- 643 Sniegula, S., Janssens, L., & Stoks, R. (2017). Integrating multiple stressors across life stages  
644 and latitudes: Combined and delayed effects of an egg heat wave and larval pesticide  
645 exposure in a damselfly. *Aquatic Toxicology*, *186*, 113–122.  
646 <https://doi.org/10.1016/j.aquatox.2017.02.029>
- 647 Sniegula, S., Raczyński, M., Golab, M. J., & Johansson, F. (2020). Effects of predator cues  
648 carry over from egg and larval stage to adult life-history traits in a damselfly.  
649 *Freshwater Science*, *39*(4), 804–811. <https://doi.org/10.1086/711374>
- 650 Sokolovska, N., Rowe, L., & Johansson, F. (2000). Fitness and body size in mature odonates.  
651 *Ecological Entomology*, *25*(2), 239–248. <https://doi.org/10.1046/j.1365-2311.2000.00251.x>
- 652
- 653 Stoks, R., Swillen, I., & De Block, M. (2012). Behaviour and physiology shape the growth  
654 accelerations associated with predation risk, high temperatures and southern latitudes  
655 in *Ischnura* damselfly larvae. *Journal of Animal Ecology*, *81*(5), 1034–1040.  
656 <https://doi.org/10.1111/j.1365-2656.2012.01987.x>
- 657 Tam, B. Y., Gough, W. A., & Mohsin, T. (2015). The impact of urbanization and the urban  
658 heat island effect on day to day temperature variation. *Urban Climate*, *12*, 1–10.  
659 <https://doi.org/10.1016/j.uclim.2014.12.004>
- 660 The General Directorate for Environmental Protection. (2018). *Orconectes limosus*. [accessed  
661 17.02.2023] <https://projekty.gdos.gov.pl/igo-orconectes-limosus>; In Appendix A,  
662 Smietana P, Bonk M, Solarz W [accessed 17.02.2023]  
663 [https://projekty.gdos.gov.pl/files/artykuly/126882/Orconectes-limosus\\_rak-  
664 pregowany\\_EN\\_icon.pdf](https://projekty.gdos.gov.pl/files/artykuly/126882/Orconectes-limosus_rak-pregowany_EN_icon.pdf)
- 665 Tüzün, N., & Stoks, R. (2021). Lower bioenergetic costs but similar immune responsiveness  
666 under a heat wave in urban compared to rural damselflies. *Evolutionary Applications*,  
667 *14*(1), 24–35. <https://doi.org/10.1111/eva.13041>
- 668 Van Dievel, M., Janssens, L., & Stoks, R. (2016). Short- and long-term behavioural,  
669 physiological and stoichiometric responses to predation risk indicate chronic stress  
670 and compensatory mechanisms. *Oecologia*, *181*(2), 347–357.  
671 <https://doi.org/10.1007/s00442-015-3440-1>
- 672 Verheyen, J., Tüzün, N., & Stoks, R. (2019). Using natural laboratories to study evolution to  
673 global warming: Contrasting altitudinal, latitudinal, and urbanization gradients.  
674 *Current Opinion in Insect Science*, *35*, 10–19.  
675 <https://doi.org/10.1016/j.cois.2019.06.001>
- 676 Warkentin, K. M. (2011). Plasticity of hatching in amphibians: Evolution, trade-offs, cues  
677 and mechanisms. *Integrative and Comparative Biology*, *51*(1), 111–127.  
678  
679

680 **Acknowledgments**

681 We thank Andrzej Antoł, Maja Przybycień, Ola Rydzek and Antoni Żygadło that helped  
682 during the experiments. We thank Ulf Norling for valuable discussions on the topic. The  
683 research leading to these results was funded by the Norwegian Financial Mechanism 2014–  
684 2021, project no. 2019/34/H/NZ8/00683 (ECOPOND). S.S. was further supported by the  
685 National Science Centre, Poland (project no. 2019/33/B/NZ8/00521) and the Institute of  
686 Nature Conservation Polish Academy of Sciences.

687

688 **Competing interests**

689 The authors declare no conflicts of interest.

690

691 **Author contributions**

692 GP, RS and SS conceived and designed the experiments. GP and SS performed the  
693 experiments. GW analysed the data. GW and SS led the writing of the manuscript; all authors  
694 contributed critically to the drafts and gave final approval for publication.

695

696 **Date availability statement**

697 All data generated or analysed during this study are included in this article (and its  
698 supplementary information files).

699

700 **Figures.**

701 **Fig. 1.** Summary of the experimental design with a map of our sampled populations in  
702 southern Sweden (high latitude) and southern Poland (central latitude). Geographic  
703 distribution of *Ischnura elegans* in central and northern Europe is shown in grey and  
704 occurrence of the spiny-cheek crayfish *Orconectes limosus* is depicted by red crosses. On the  
705 left side, we show the design of the experiment 1 focusing on rural and urban populations  
706 from central and high latitude reared at current (20 °C) and warming (24 °C) temperature.  
707 Illustrative plot shows the significant interaction latitude × urbanization for the final larval  
708 instar (F-0) mass. On the right side, we show the design of the experiment 2 focusing on  
709 urban and rural populations from high latitude reared at current (20 °C), warming (24 °C),  
710 and heat wave (28 °C) temperature and in a control or a predator cue treatment. Illustrative  
711 plot shows the significant interaction temperature × predator cue for the growth rate until F-0.  
712

713 **Fig 2.** Larval (A) mass  $F_0$  and (B) growth rate  $F_0$  (GR  $F_0$ ) across urban and rural populations  
714 and current (20 °C) and warming (24 °C) temperature. Larval (C) mass  $F_0$  and (D) GR  $F_0$   
715 across urban and rural populations for females and males in experiment 1.  
716

717 **Fig 3.** Principal component analysis showing evolutionary changes before the treatment with  
718 predator cue in response to urbanization at current (20 °C) and warming (24 °C) for (A)  
719 central- and (B) high latitude populations and plastic changes in response to temperature in  
720 rural and urban populations for (C) central- and (D) high latitude populations (sexes pooled).  
721 Rural and urban individuals are depicted by open circles and triangles respectively;  
722 temperature by colours (blue = 20 °C and green = 24 °C); filled circles and triangles  
723 correspond to the centroid of each group; solid lines connecting filled symbols represent the  
724 vector.  
725

726 **Fig 4.** Phenotypic plasticity trajectory in response to (A) urbanization at current (20 °C),  
727 warming temperature (24 °C) and heat wave (28 °C) and to (B) temperature for rural and  
728 urban populations. Rural and urban individuals are depicted by open circles and triangles  
729 respectively; temperature by colours (blue = 20 °C, green = 24 °C and red = 28 °C); filled  
730 circles and triangles correspond to the centroid of each group; solid lines connecting filled  
731 symbols represent the vector.

**Table 1.** Results of the GLMM of the Experiment 1. Table shows effects of sex (females and males), latitude (central and high latitude), urbanization (rural and urban), temperature (20 °C and 24 °C) and of their interactions on larval development time, mass and growth rate (A) at entrance to F-0 (DT<sub>F0</sub>, Mass<sub>F0</sub> and GR<sub>F0</sub>) and (B) during the five-days exposure period to predator cues (GR<sub>final</sub>). For each variable, we limited the analysis to the relevant predictors and interactions determined by the model selection analysis. The duration of the temperature treatment (post-winter ‘thermal exposure duration’) was included as covariate. Effects of random factors are not shown.

|                           |    | At entrance to F-0           |                              |                            |                           |    | Predator treatment        |
|---------------------------|----|------------------------------|------------------------------|----------------------------|---------------------------|----|---------------------------|
| <b>A.</b>                 |    | Dev. time <sub>F0</sub>      | Mass <sub>F0</sub>           | GR <sub>F0</sub>           | <b>B.</b>                 |    | GR <sub>final</sub>       |
| Variables                 | df | <i>p</i>                     | <i>p</i>                     | <i>p</i>                   | Variables                 | df | <i>p</i>                  |
| Thermal exposure duration | 1  | /                            | <b>0.001</b><br>(10.1) **    | <b>0.001</b><br>(1150) *** | Thermal exposure duration | 1  | <b>0.001</b><br>(10.6) ** |
| Sex                       | 1  | /                            | < <b>0.001</b><br>(80.7) *** | <b>0.001</b><br>(75.2) *** | Latitude                  | 1  | <b>0.022</b><br>(5.25) *  |
| Latitude                  | 1  | < <b>0.001</b><br>(14.2) *** | < <b>0.001</b><br>(53.1) *** | <b>0.001</b><br>(112) ***  | Predator                  | 1  | <b>0.004</b><br>(8.39) ** |
| Temperature               | 1  | < <b>0.001</b><br>(50.0) *** | < <b>0.001</b><br>(76.7) *** | <b>0.001</b><br>(62.0) *** |                           |    |                           |
| Urbanization              | 1  | /                            | 0.308<br>(1.03)              | 0.236<br>(1.41)            |                           |    |                           |
| Latitude × sex            | 1  | /                            | <b>0.036</b><br>(4.40)       | 0.116<br>(2.47)            |                           |    |                           |
| Latitude × temperature    | 1  | /                            | 0.050<br>(3.83)              | <b>0.017</b><br>(5.71) *   |                           |    |                           |
| Latitude × urbanization   | 1  | /                            | <b>0.004</b><br>(8.15) **    | /                          |                           |    |                           |
| Temperature × sex         | 1  | /                            | 0.165                        | /                          |                           |    |                           |

|                          |   |   |        |                                  |                                 |  |  |
|--------------------------|---|---|--------|----------------------------------|---------------------------------|--|--|
|                          |   |   | (1.93) |                                  |                                 |  |  |
| Temperature urbanization | × | 1 | /      | <b>0.010</b><br><b>(6.70) **</b> | <b>0.047</b><br><b>(3.93) *</b> |  |  |
| Urbanization × sex       |   | 1 | /      | <b>0.027</b><br><b>(4.87) *</b>  | <b>0.032</b><br><b>(4.59) *</b> |  |  |

Table shows p-values and Wald Chi-squared statistic (in parentheses) for each variable. Significance is indicated by \*\*\*  $p < 0.001$ , \*\*  $p < 0.01$ , \*  $p < 0.05$ .

**Table 2.** Results of the GLMM of the Experiment 2. Table shows effects of sex (females and males), urbanization (rural and urban), temperature (20 °C, 24 °C and 28 °C) and of their interactions on larval development time, mass and growth rate (A) at entrance to F-0 (Dev. time<sub>F0</sub>, Mass<sub>F0</sub> and GR<sub>F0</sub>) and (B) during the five-days exposure period to predator cues (GR<sub>final</sub>). For each variable, we limited the analysis to the relevant predictors and interactions determined by the model selection analysis. The duration of the temperature treatment (post-winter ‘thermal exposure duration’) was included as covariate. Effects of random factors are not shown.

|                            |    | At entrance to F-0           |                              |                              | Predator treatment        |    |                              |
|----------------------------|----|------------------------------|------------------------------|------------------------------|---------------------------|----|------------------------------|
| <b>A.</b>                  |    | Dev. time <sub>F0</sub>      | Mass <sub>F0</sub>           | GR <sub>F0</sub>             | <b>B.</b>                 |    | GR <sub>final</sub>          |
| Variables                  | df | <i>p</i>                     | <i>p</i>                     | <i>p</i>                     | Variables                 | df | <i>p</i>                     |
| Thermal exposure duration  | 1  | /                            | < <b>0.001</b><br>(34.3) *** | < <b>0.001</b><br>(1168) *** | Thermal exposure duration | 1  | < <b>0.001</b><br>(12.5) *** |
| Sex                        | 1  | <b>0.029</b><br>(4.78) *     | < <b>0.001</b><br>(91.1) *** | < <b>0.001</b><br>(84.8) *** | Temperature               | 2  | 0.122<br>(4.21)              |
| Temperature                | 2  | < <b>0.001</b><br>(43.0) *** | < <b>0.001</b><br>(324) ***  | < <b>0.001</b><br>(316) ***  | Predator                  | 1  | 0.344<br>(0.89)              |
| Urbanization               | 1  | 0.063<br>(3.43)              | /                            | /                            | Temperature × predator    | 2  | <b>0.001</b><br>(13.0) **    |
| Temperature × sex          | 2  | /                            | <b>0.020</b><br>(7.83) *     | <b>0.026</b><br>(7.29) *     |                           |    |                              |
| Temperature × urbanization | 2  | 0.31<br>(2.36)               | /                            | /                            |                           |    |                              |

Table shows p-values and Wald Chi-squared statistic (in parentheses) for each variable. Significance is indicated by \*\*\*  $p < 0.001$ , \*\*  $p < 0.01$ , \*  $p < 0.05$ .

## Experiment 1

Post-wintering

Effect of latitude and urbanization on mass at F-0  
F-0

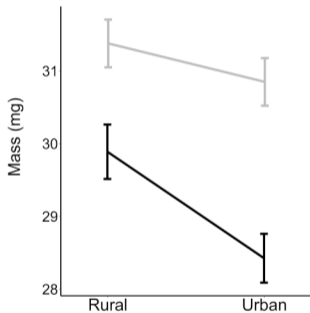

Region

— Central latitude  
— High latitude

Distributions,  
sampling

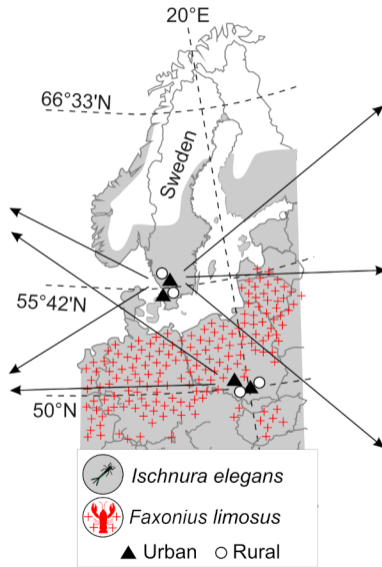

## Experiment 2

Post-wintering

Effect of temperature and predator cue on  
growth rate at F-0

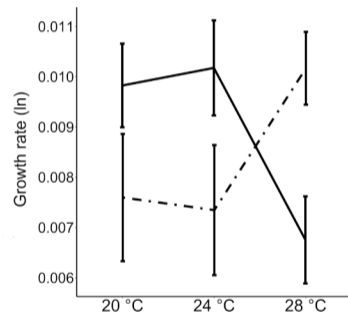

Treatment

— Control  
- - - Predator

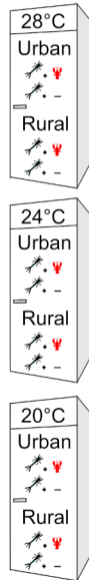



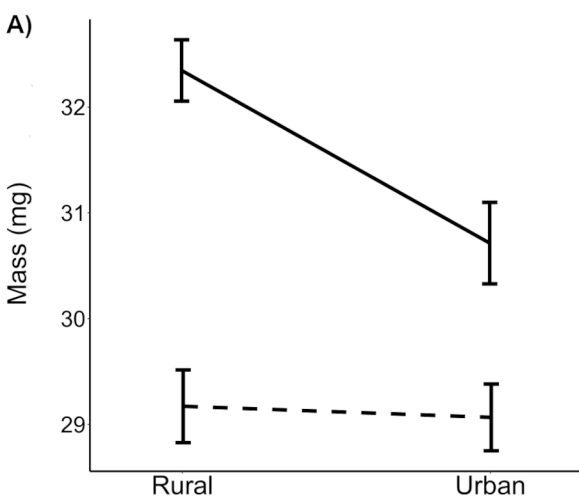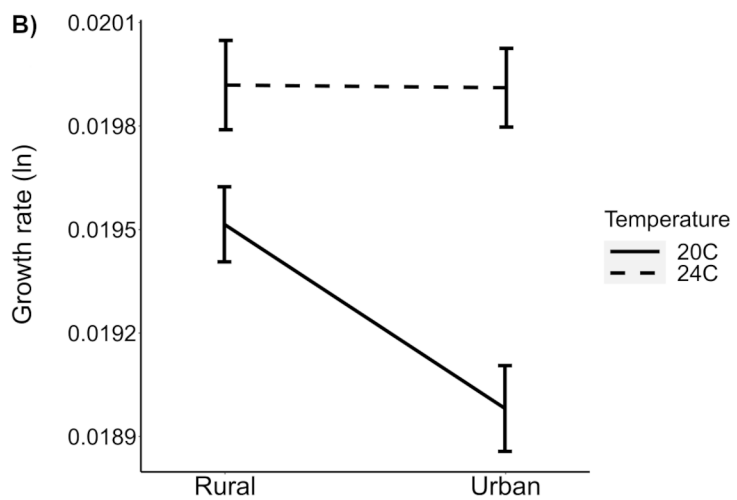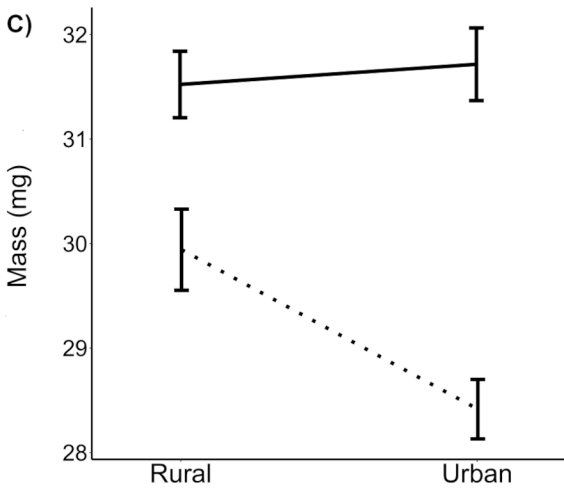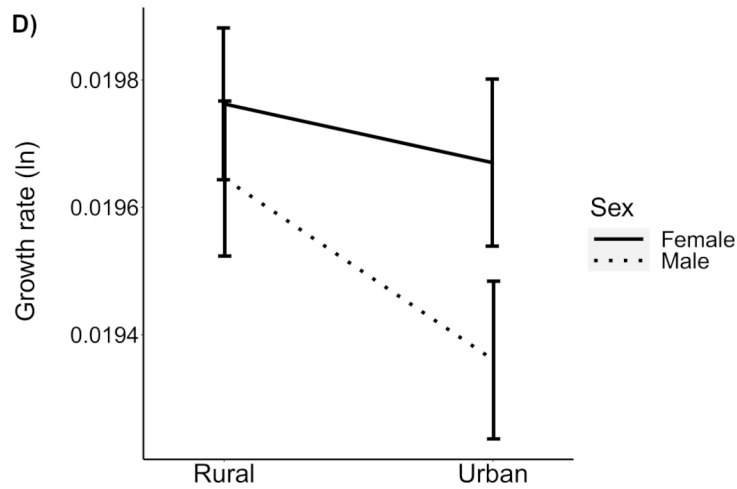

Central latitude

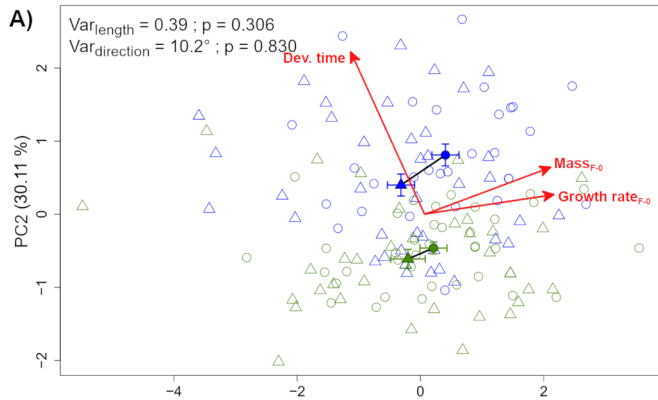

High latitude

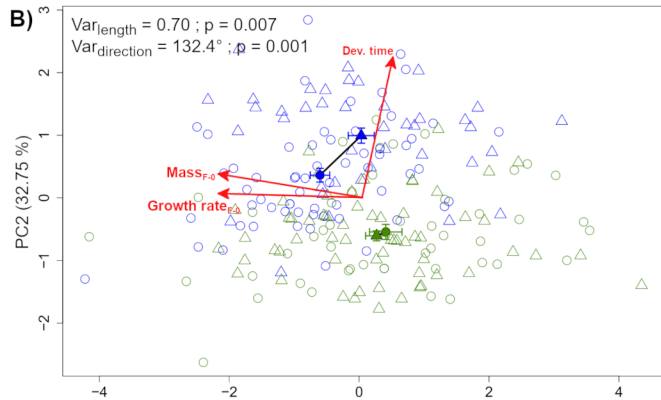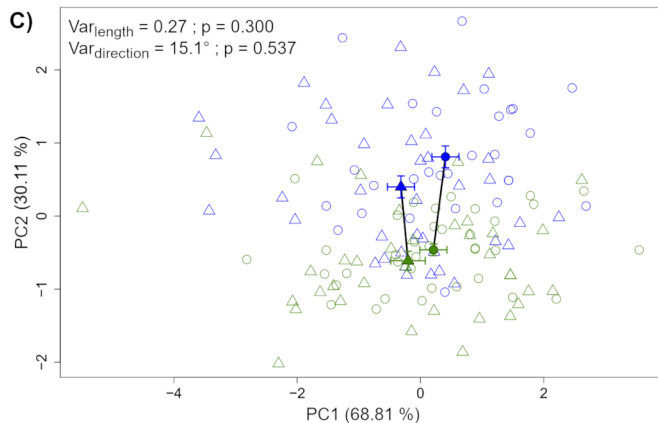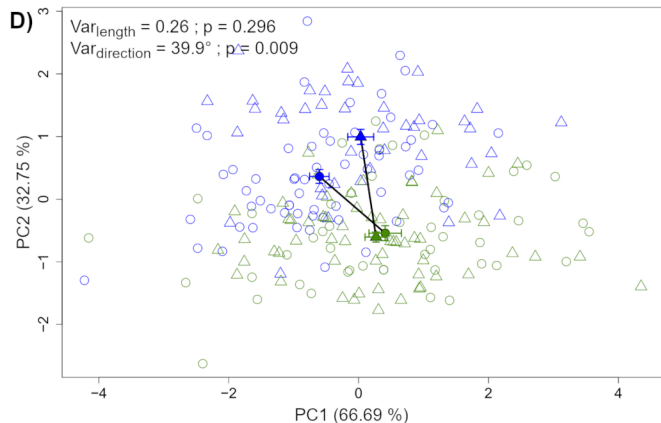

○ Rural 20 °C    ○ Rural 24 °C  
 △ Urban 20 °C    △ Urban 24 °C

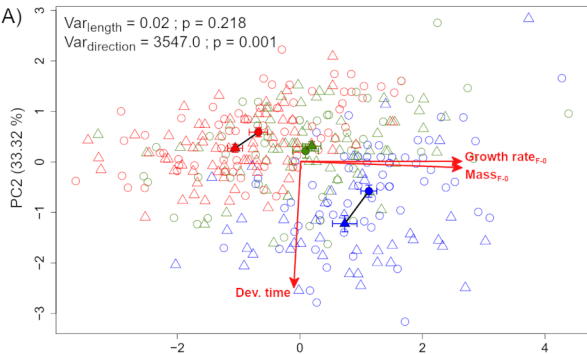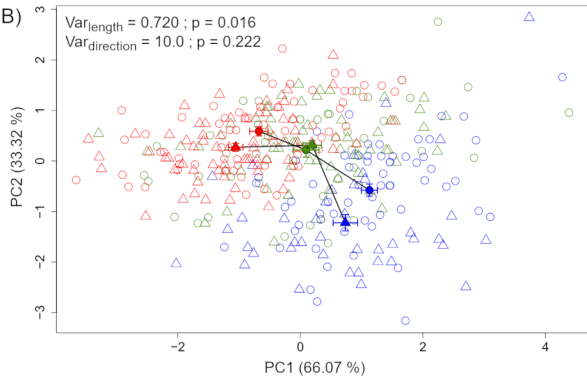

○ Rural 20 °C    ○ Rural 24 °C    ○ Rural 28 °C  
 △ Urban 20 °C    △ Urban 24 °C    △ Urban 28 °C
